# Supplementary material
Source: HighWire-hosted journal article supplement (https://bmjopenquality.bmj.com/highwire/filestream/136100/field_highwire_adjunct_files/0/ds2162.docx)
Supplement: ds2162.docx [file ds2162.docx]

**Checking NG Tube Placement – F1 Questionnaire**

**1. Have you been asked to check NG tube placement before?**

Yes No

**2. Have you had formal training or assessment in using x-ray to identify position of NG tube?** (Please circle)

Yes No

**3. How confident do you feel about checking NG placement?**

(0-10; where 10 = very confident)

**4. What is the first line method for checking NG tube placement?**

⬜ pH sensitive paper ⬜ Litmus paper ⬜ X-ray confirmation

⬜ Colour of aspirate ⬜ ‘Whoosh test’

**5. What is the second line method for checking NG placement?**

⬜ pH sensitive paper ⬜ Litmus paper ⬜ X-ray confirmation

⬜ Colour of aspirate ⬜ ‘Whoosh test’

**6. What is the recommended cut-off pH for confirming gastric placement of NG tube?**

**7. On CXR, what criteria do you use to identify correct placement of NG tube?**

**THANK YOU FOR COMPLETING OUR QUESTIONNAIRE!**

Sindy Lee and Ellie Mason
